# Supplementary material
Source: bioRxiv or medRxiv preprint supplement (https://www.medrxiv.org/highwire/filestream/79231/field_highwire_adjunct_files/1/2020.04.30.20086637-2.pdf)

**Online Supplemental Information**  
**Transfer Learning Model Performance**

**Contents**

|                                                                |    |
|----------------------------------------------------------------|----|
| <b>Data Augmentation</b> .....                                 | 2  |
| <b>Resnet-32</b> .....                                         | 3  |
| Model Training – Curve and Errors after weights unfrozen ..... | 3  |
| Hold-Out Set Confusion Matrix.....                             | 4  |
| <b>Resnet-50</b> .....                                         | 5  |
| Model Training – Curve and Errors after weights unfrozen ..... | 5  |
| Hold-Out Set Confusion Matrix.....                             | 6  |
| <b>Resnet-101</b> .....                                        | 7  |
| Model Training – Curve and Errors after weights unfrozen ..... | 7  |
| Hold-Out Set Confusion Matrix.....                             | 8  |
| <b>Resnet-152</b> .....                                        | 9  |
| Model Training – Curve and Errors after weights unfrozen ..... | 9  |
| Hold-Out Set Confusion Matrix.....                             | 10 |

# Data Augmentation

Example batch of 6 cases of training data after augmentation

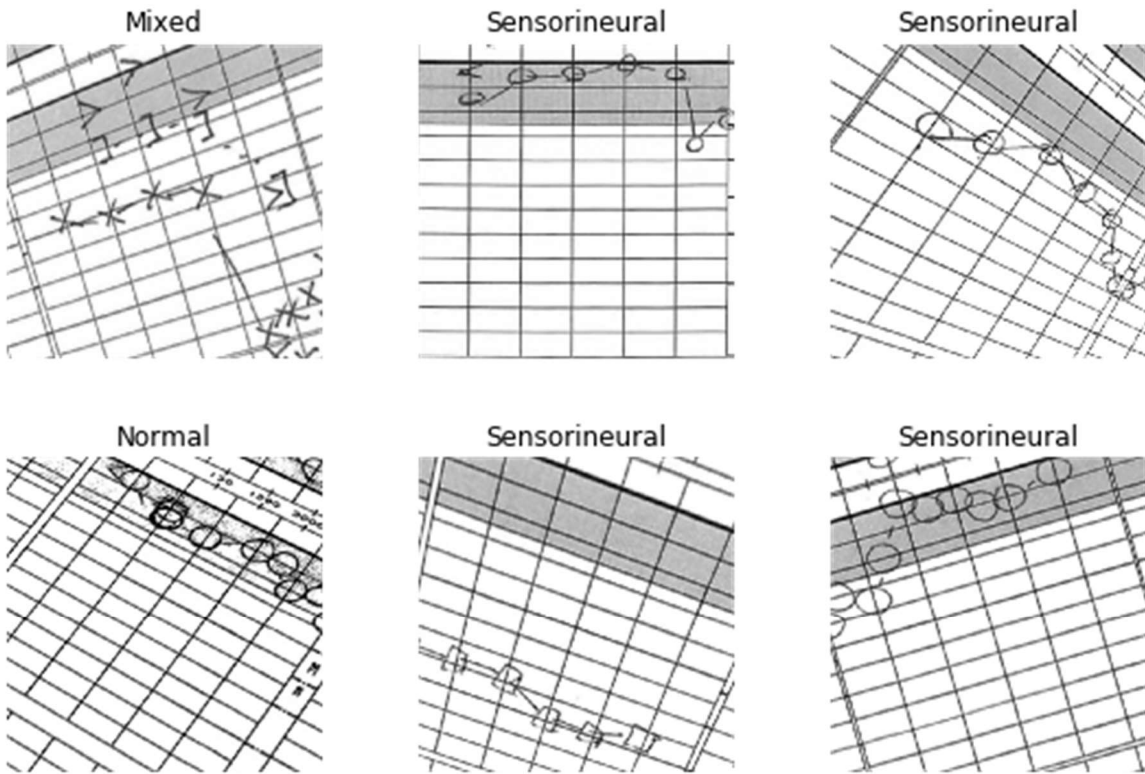

## Resnet-32

Model Training – Curve and Errors after weights unfrozen

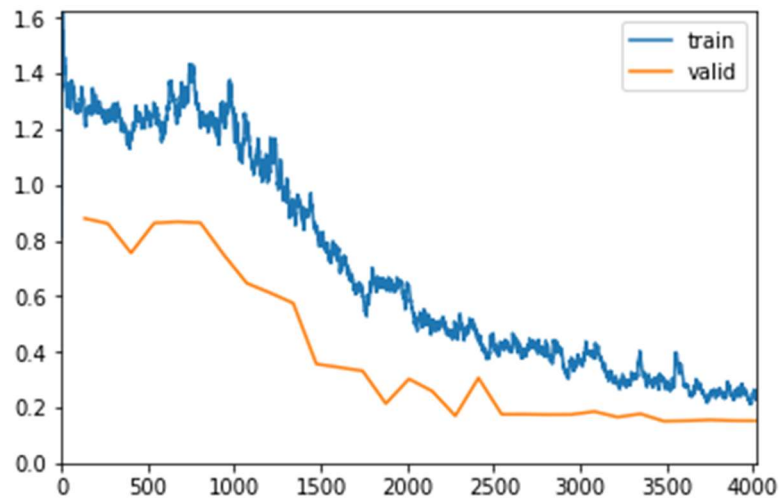

| epoch | train_loss | valid_loss | accuracy | time  |
|-------|------------|------------|----------|-------|
| 0     | 1.244090   | 0.879343   | 0.635468 | 04:16 |
| 1     | 1.259248   | 0.860820   | 0.625616 | 04:11 |
| 2     | 1.158957   | 0.755176   | 0.669951 | 04:10 |
| 3     | 1.283363   | 0.862626   | 0.665025 | 04:12 |
| 4     | 1.263539   | 0.867020   | 0.669951 | 04:11 |
| 5     | 1.227846   | 0.863541   | 0.738916 | 04:08 |
| 6     | 1.222996   | 0.749195   | 0.738916 | 04:10 |
| 7     | 1.189224   | 0.646386   | 0.798030 | 04:14 |
| 8     | 1.049638   | 0.611959   | 0.802956 | 04:07 |
| 9     | 0.949003   | 0.575030   | 0.807882 | 04:07 |
| 10    | 0.838476   | 0.356252   | 0.871921 | 04:06 |
| 11    | 0.729603   | 0.343971   | 0.876847 | 04:08 |
| 12    | 0.606601   | 0.331202   | 0.881773 | 04:05 |
| 13    | 0.647186   | 0.213976   | 0.916256 | 04:10 |
| 14    | 0.632774   | 0.302349   | 0.911330 | 04:09 |
| 15    | 0.505771   | 0.258871   | 0.921182 | 04:16 |

| epoch | train_loss | valid_loss | accuracy | time  |
|-------|------------|------------|----------|-------|
| 16    | 0.489470   | 0.169743   | 0.940887 | 04:11 |
| 17    | 0.448995   | 0.306197   | 0.901478 | 04:17 |
| 18    | 0.427638   | 0.175343   | 0.940887 | 04:08 |
| 19    | 0.405996   | 0.175510   | 0.935961 | 04:11 |
| 20    | 0.417301   | 0.174307   | 0.945813 | 04:10 |
| 21    | 0.365212   | 0.174701   | 0.955665 | 04:09 |
| 22    | 0.397123   | 0.185349   | 0.945813 | 04:13 |
| 23    | 0.289348   | 0.165375   | 0.950739 | 04:14 |
| 24    | 0.379002   | 0.176995   | 0.945813 | 04:18 |
| 25    | 0.294081   | 0.150609   | 0.955665 | 04:14 |
| 26    | 0.279483   | 0.152205   | 0.960591 | 04:08 |
| 27    | 0.239692   | 0.155346   | 0.945813 | 04:17 |
| 28    | 0.231282   | 0.152468   | 0.960591 | 04:07 |
| 29    | 0.240824   | 0.151910   | 0.960591 | 04:07 |

## Hold-Out Set Confusion Matrix

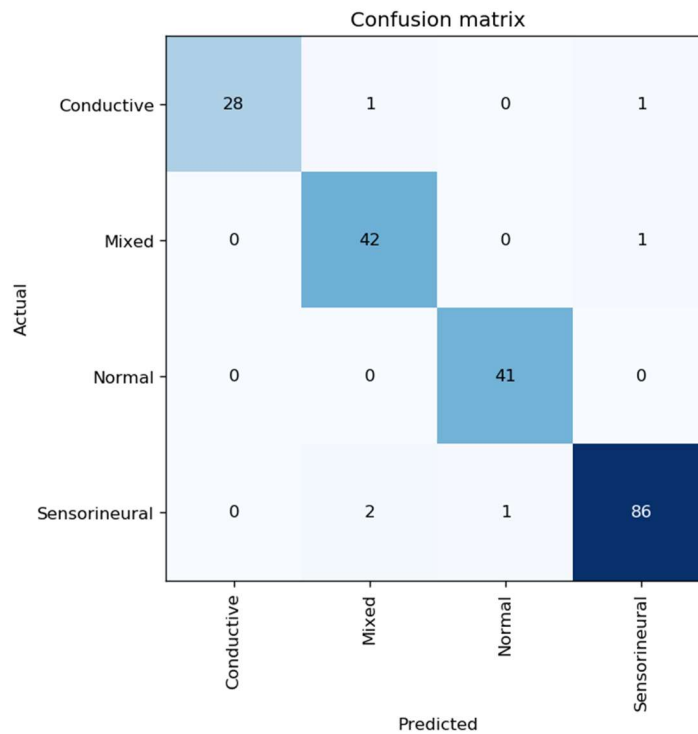

# Resnet-50

Model Training – Curve and Errors after weights unfrozen

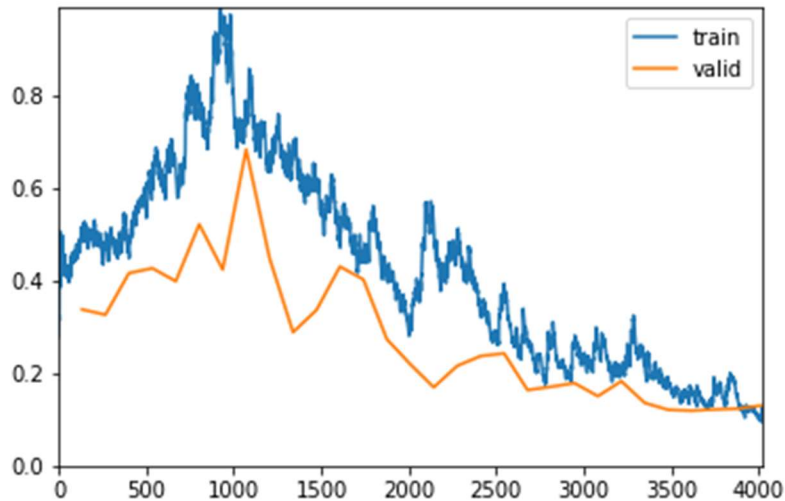

| epoch | train_loss | valid_loss | accuracy | time  |
|-------|------------|------------|----------|-------|
| 0     | 0.510335   | 0.337855   | 0.886699 | 07:20 |
| 1     | 0.471578   | 0.326414   | 0.866995 | 07:21 |
| 2     | 0.461553   | 0.416358   | 0.866995 | 07:19 |
| 3     | 0.606798   | 0.426956   | 0.852217 | 07:22 |
| 4     | 0.647057   | 0.398874   | 0.847291 | 07:22 |
| 5     | 0.788327   | 0.521982   | 0.817734 | 07:20 |
| 6     | 0.942470   | 0.424105   | 0.847291 | 07:18 |
| 7     | 0.779164   | 0.683749   | 0.763547 | 07:23 |
| 8     | 0.665366   | 0.448418   | 0.837438 | 07:21 |
| 9     | 0.682432   | 0.288700   | 0.896552 | 07:23 |
| 10    | 0.606550   | 0.336674   | 0.901478 | 07:24 |
| 11    | 0.490147   | 0.430618   | 0.847291 | 07:21 |
| 12    | 0.440067   | 0.402663   | 0.837438 | 07:22 |
| 13    | 0.408181   | 0.273450   | 0.906404 | 07:24 |
| 14    | 0.302089   | 0.219499   | 0.926108 | 07:21 |
| 15    | 0.523754   | 0.169565   | 0.935961 | 07:22 |
| 16    | 0.463680   | 0.215869   | 0.940887 | 07:22 |

| epoch | train_loss | valid_loss | accuracy | time  |
|-------|------------|------------|----------|-------|
| 17    | 0.337211   | 0.237099   | 0.926108 | 07:24 |
| 18    | 0.374474   | 0.242915   | 0.921182 | 07:20 |
| 19    | 0.266647   | 0.163551   | 0.955665 | 07:23 |
| 20    | 0.252035   | 0.170647   | 0.945813 | 07:24 |
| 21    | 0.257178   | 0.178548   | 0.945813 | 07:27 |
| 22    | 0.261984   | 0.150368   | 0.945813 | 07:24 |
| 23    | 0.205380   | 0.182622   | 0.950739 | 07:23 |
| 24    | 0.218000   | 0.135632   | 0.955665 | 07:24 |
| 25    | 0.182137   | 0.120900   | 0.970443 | 07:20 |
| 26    | 0.155013   | 0.119060   | 0.970443 | 07:34 |
| 27    | 0.179292   | 0.121570   | 0.970443 | 07:25 |
| 28    | 0.136012   | 0.123475   | 0.960591 | 07:24 |
| 29    | 0.121631   | 0.130360   | 0.960591 | 07:23 |

## Hold-Out Set Confusion Matrix

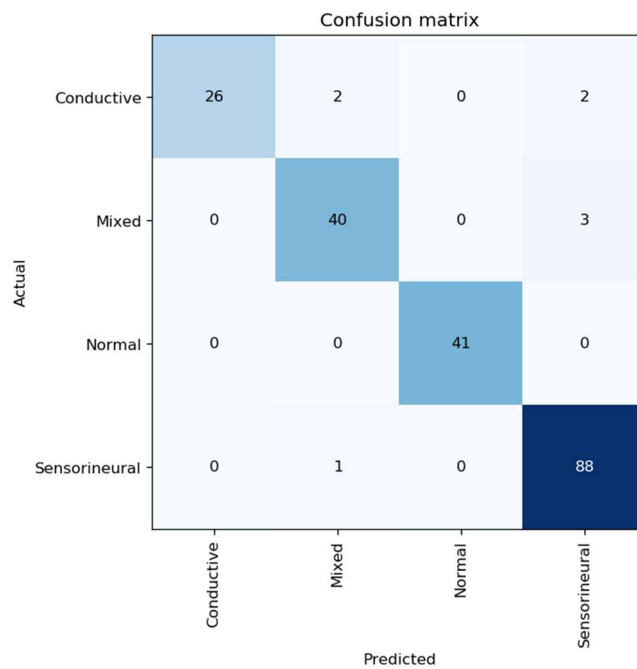

# Resnet-101

Model Training – Curve and Errors after weights unfrozen

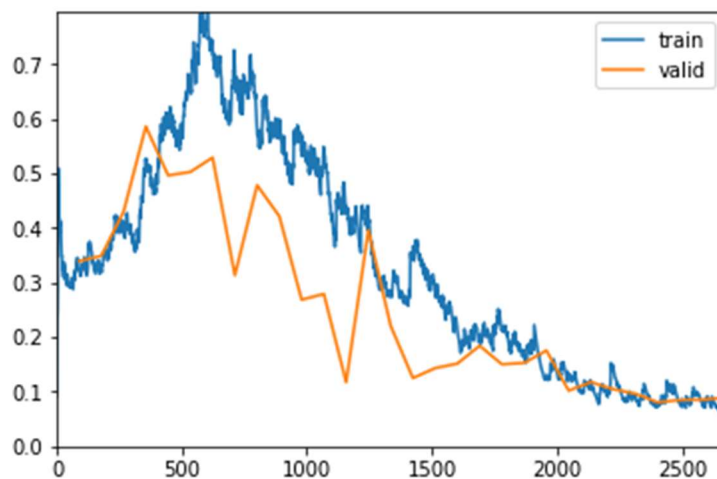

| epoch | train_loss | valid_loss | accuracy | time  |
|-------|------------|------------|----------|-------|
| 0     | 0.326433   | 0.338792   | 0.896552 | 11:21 |
| 1     | 0.324985   | 0.348884   | 0.881773 | 11:21 |
| 2     | 0.405100   | 0.429743   | 0.847291 | 11:26 |
| 3     | 0.523556   | 0.585807   | 0.822660 | 11:21 |
| 4     | 0.600934   | 0.496032   | 0.857143 | 11:21 |
| 5     | 0.672066   | 0.502438   | 0.857143 | 11:20 |
| 6     | 0.740953   | 0.528722   | 0.871921 | 11:22 |
| 7     | 0.706139   | 0.313337   | 0.881773 | 11:19 |
| 8     | 0.585813   | 0.478064   | 0.886699 | 11:20 |
| 9     | 0.565287   | 0.421197   | 0.857143 | 11:20 |
| 10    | 0.544313   | 0.268525   | 0.921182 | 11:20 |
| 11    | 0.548240   | 0.278945   | 0.921182 | 11:16 |
| 12    | 0.425692   | 0.117333   | 0.960591 | 11:21 |
| 13    | 0.424688   | 0.395999   | 0.891626 | 11:23 |
| 14    | 0.274210   | 0.220875   | 0.921182 | 11:23 |
| 15    | 0.348999   | 0.124999   | 0.950739 | 11:24 |
| 16    | 0.285168   | 0.143200   | 0.965517 | 11:25 |
| 17    | 0.215300   | 0.151461   | 0.960591 | 11:23 |

| epoch | train_loss | valid_loss | accuracy | time  |
|-------|------------|------------|----------|-------|
| 18    | 0.203426   | 0.184174   | 0.955665 | 11:25 |
| 19    | 0.216606   | 0.150258   | 0.945813 | 11:22 |
| 20    | 0.169976   | 0.152677   | 0.955665 | 11:27 |
| 21    | 0.122940   | 0.175468   | 0.935961 | 11:17 |
| 22    | 0.129640   | 0.101892   | 0.960591 | 11:24 |
| 23    | 0.119503   | 0.117601   | 0.960591 | 11:19 |
| 24    | 0.144181   | 0.104639   | 0.960591 | 11:22 |
| 25    | 0.091448   | 0.096408   | 0.975369 | 11:22 |
| 26    | 0.074603   | 0.080531   | 0.970443 | 11:25 |
| 27    | 0.082557   | 0.084802   | 0.965517 | 11:28 |
| 28    | 0.079398   | 0.085283   | 0.970443 | 11:27 |
| 29    | 0.057321   | 0.089062   | 0.965517 | 11:28 |

## Hold-Out Set Confusion Matrix

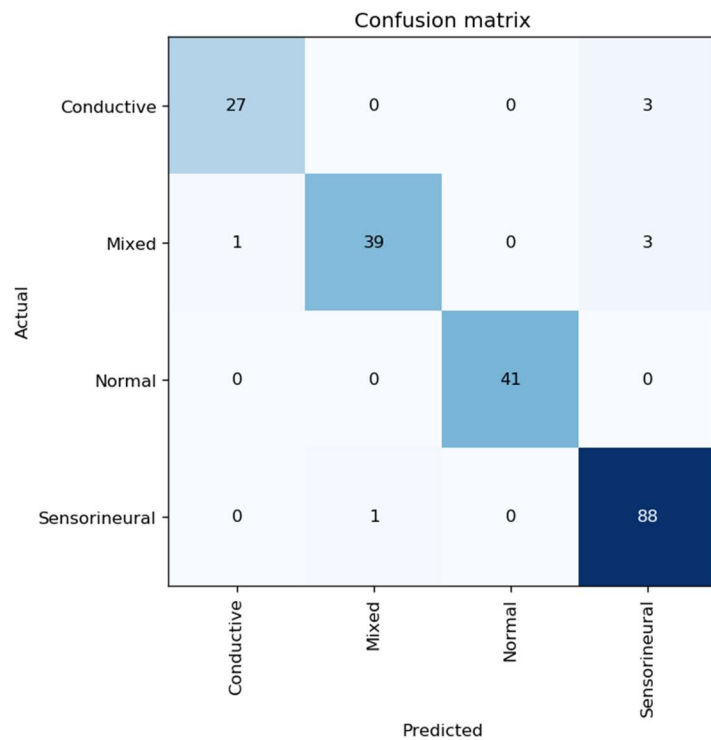



## Resnet-152

Model Training – Curve and Errors after weights unfrozen

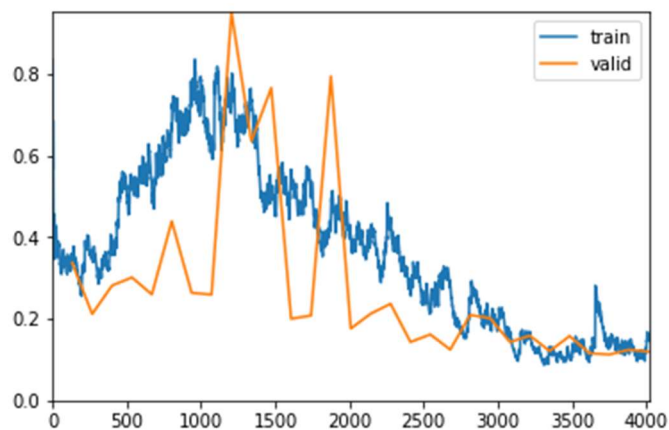

| epoch | train_loss | valid_loss | accuracy | time  |
|-------|------------|------------|----------|-------|
| 0     | 0.349285   | 0.336744   | 0.896552 | 16:14 |
| 1     | 0.351946   | 0.211835   | 0.906404 | 16:01 |
| 2     | 0.370788   | 0.281822   | 0.911330 | 16:08 |
| 3     | 0.545162   | 0.301549   | 0.886699 | 16:05 |
| 4     | 0.535766   | 0.259898   | 0.896552 | 16:06 |
| 5     | 0.677419   | 0.439479   | 0.876847 | 16:07 |
| 6     | 0.732154   | 0.263875   | 0.911330 | 16:05 |
| 7     | 0.634412   | 0.259429   | 0.901478 | 16:00 |
| 8     | 0.734798   | 0.951959   | 0.694581 | 16:03 |
| 9     | 0.732122   | 0.635523   | 0.783251 | 16:01 |
| 10    | 0.522146   | 0.766315   | 0.724138 | 16:05 |
| 11    | 0.548392   | 0.200359   | 0.921182 | 16:04 |
| 12    | 0.506737   | 0.208008   | 0.950739 | 16:04 |
| 13    | 0.447804   | 0.794851   | 0.709360 | 16:05 |
| 14    | 0.393591   | 0.176394   | 0.931035 | 16:06 |
| 15    | 0.385635   | 0.212587   | 0.926108 | 16:07 |
| 16    | 0.436395   | 0.236974   | 0.931035 | 16:06 |
| 17    | 0.270518   | 0.143313   | 0.950739 | 16:07 |
| 18    | 0.222567   | 0.161663   | 0.950739 | 16:07 |

| epoch | train_loss | valid_loss | accuracy | time  |
|-------|------------|------------|----------|-------|
| 19    | 0.281171   | 0.124618   | 0.955665 | 16:05 |
| 20    | 0.251656   | 0.209437   | 0.950739 | 16:08 |
| 21    | 0.185026   | 0.201825   | 0.950739 | 16:10 |
| 22    | 0.169664   | 0.143024   | 0.960591 | 16:06 |
| 23    | 0.168871   | 0.158863   | 0.950739 | 16:09 |
| 24    | 0.119310   | 0.121113   | 0.970443 | 16:10 |
| 25    | 0.107954   | 0.157762   | 0.955665 | 16:16 |
| 26    | 0.093890   | 0.115596   | 0.965517 | 16:14 |
| 27    | 0.145281   | 0.112563   | 0.970443 | 16:15 |
| 28    | 0.113912   | 0.124311   | 0.955665 | 16:08 |
| 29    | 0.153962   | 0.119370   | 0.965517 | 16:01 |

### Hold-Out Set Confusion Matrix

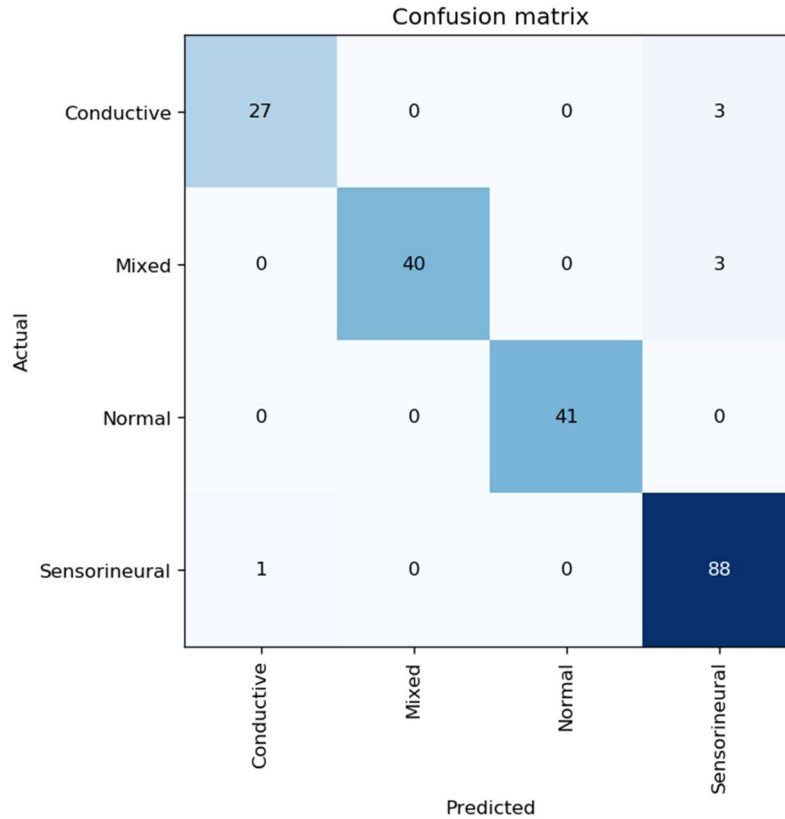

Supplement: Supplementary file [file 2020.04.30.20086637-2.pdf]
